# Supplementary material for: The effect of structural configuration on the DNA binding andin vitroantioxidant properties of new copper(ii) N2O2Schiff base complexes
Source: Royal Society of Chemistry journal article supplement (doi:10.1039/d2nj01477g), 2022-01-01
Supplement: d2nj01477g1.pdf [file d2nj01477g1.pdf]

*Electronic supplementary information*

**The effect of substituent variation on the DNA binding and *in-vitro* antioxidant properties Copper(II) Schiff bases complexes**

Tunde Lewis Yusuf,<sup>a</sup> Damilola C. Akintayo,<sup>b</sup> Segun D. Oladipo,<sup>c</sup> Adesola Adeleke,<sup>c</sup> Kolawole Olofinsan,<sup>d</sup> Banele Vatsha,<sup>a</sup> Nonhlagabezo  
Mabuba,<sup>a\*</sup>

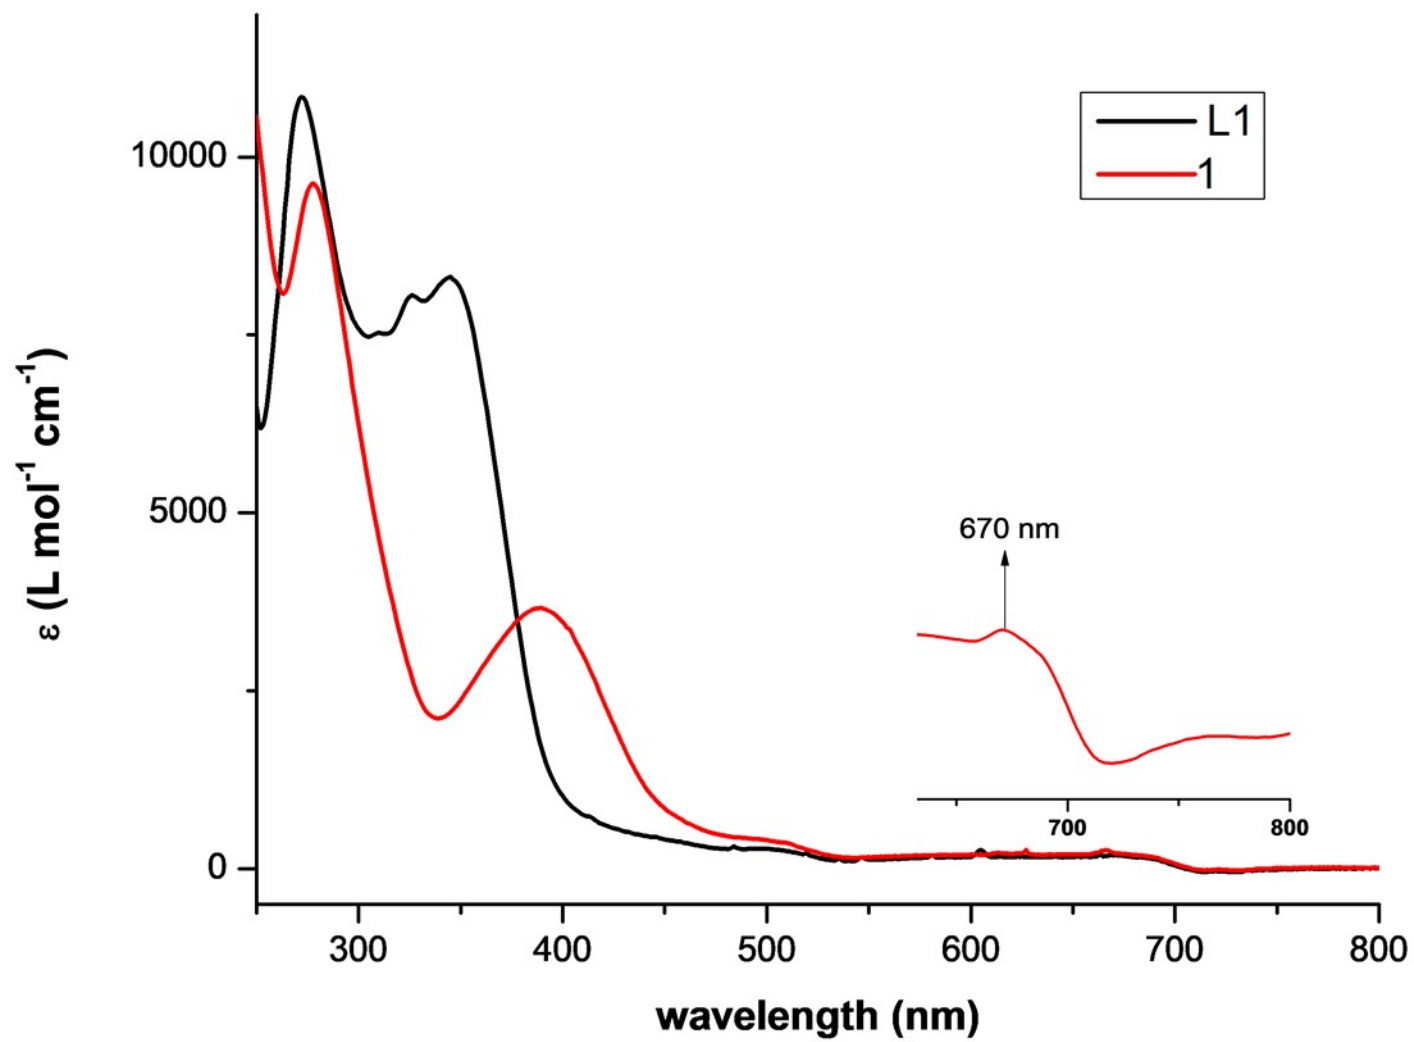

Figure 1. Electronic absorption spectra of complex 1 and L1 in DCM

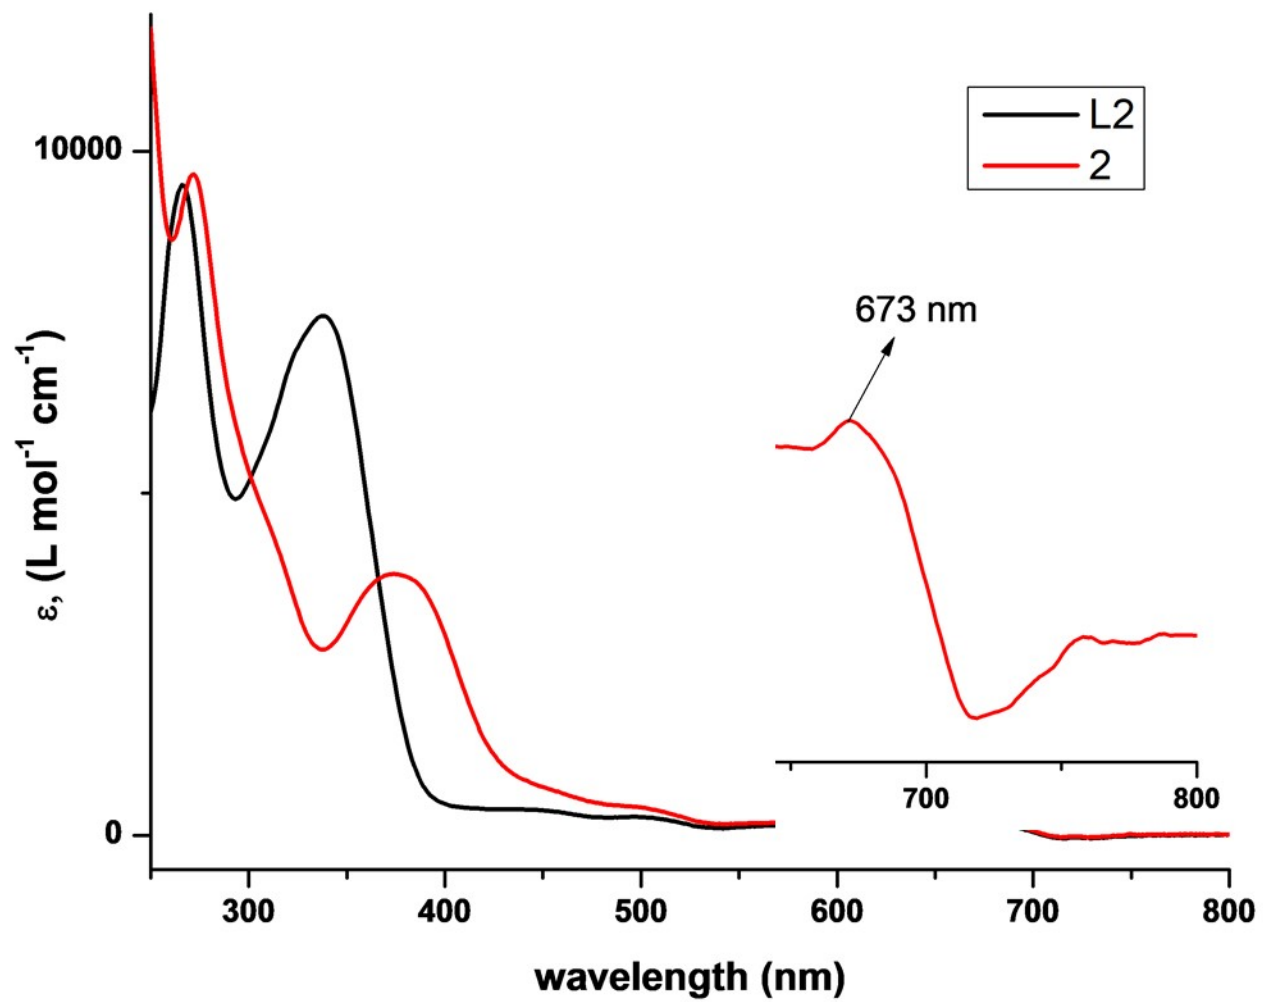

Figure 2. Electronic absorption spectra of complex 2 and L2 in DCM

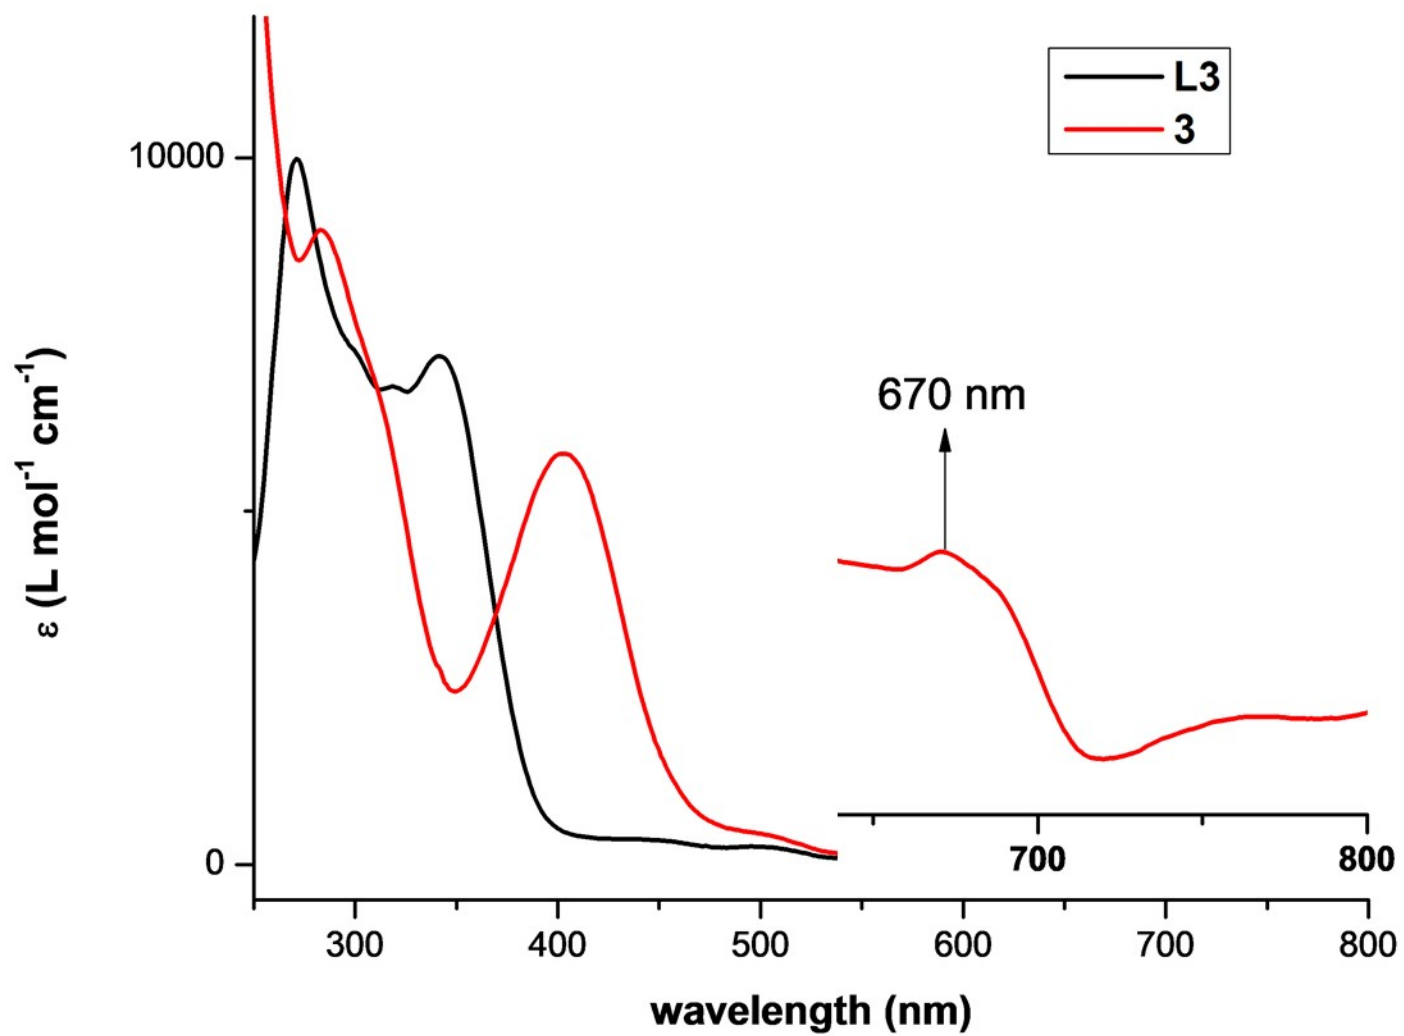

Figure 3. Electronic absorption spectra of complex 3 and L3 in DCM

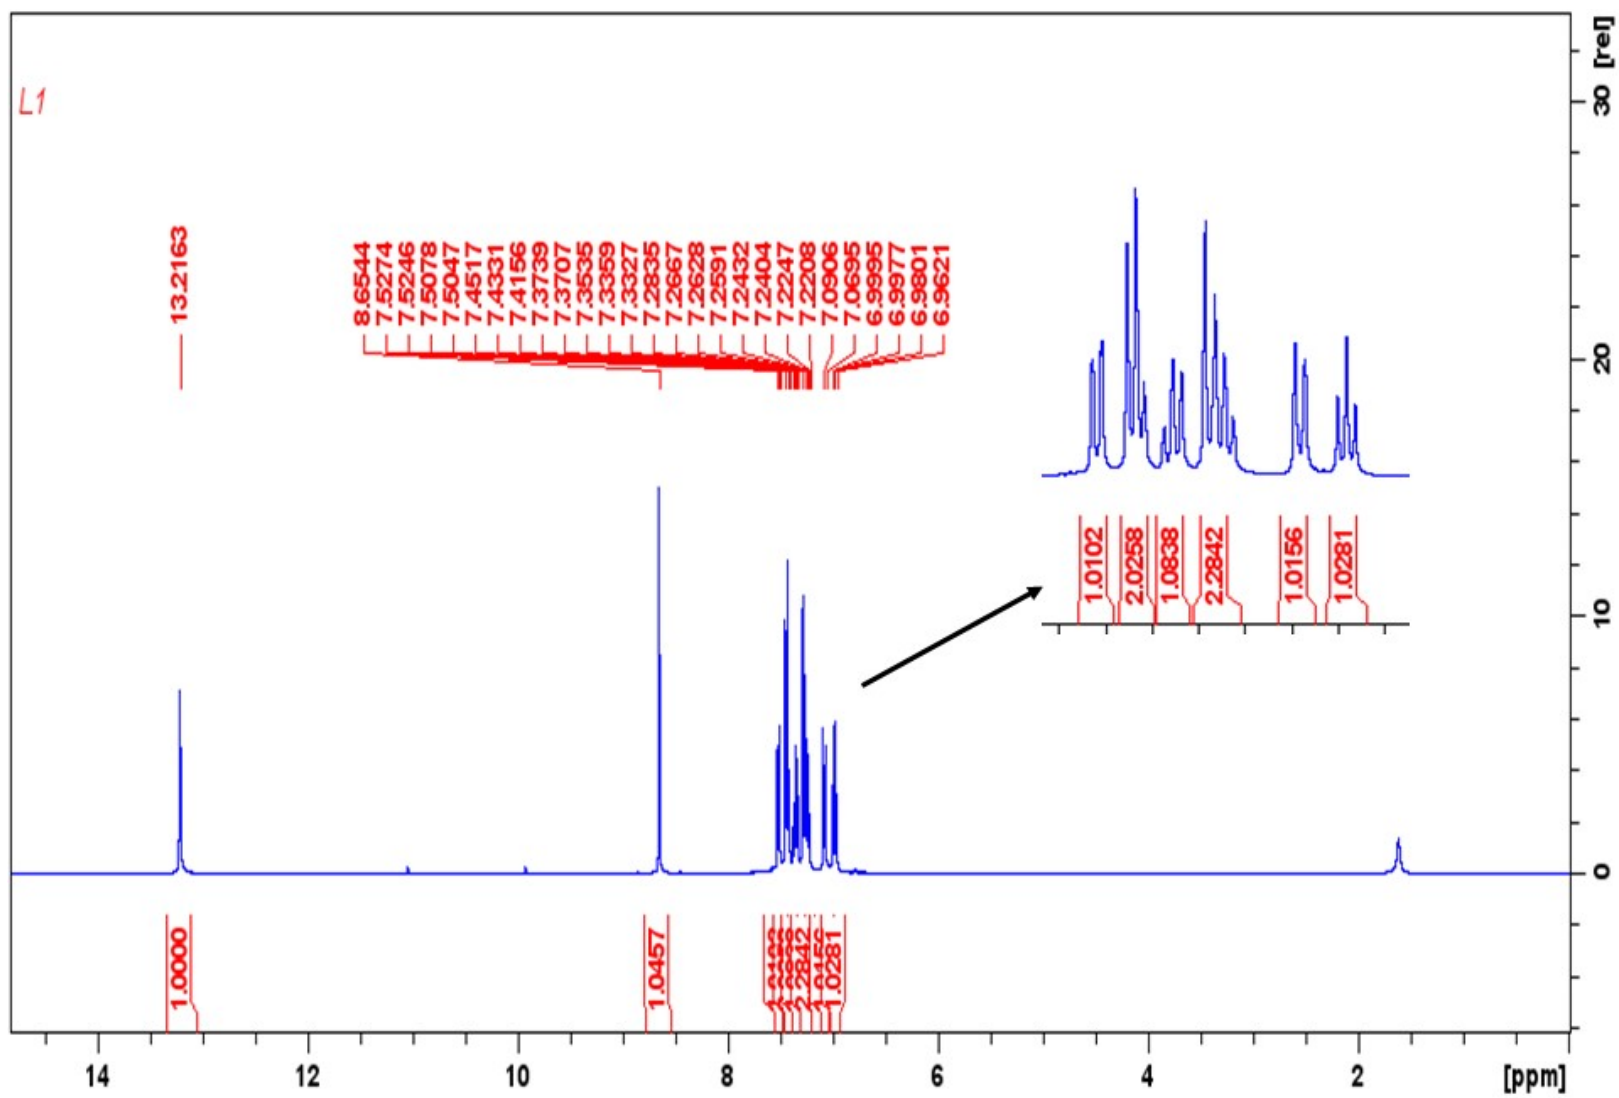

Figure 4.  $^1\text{H}$  NMR for L1

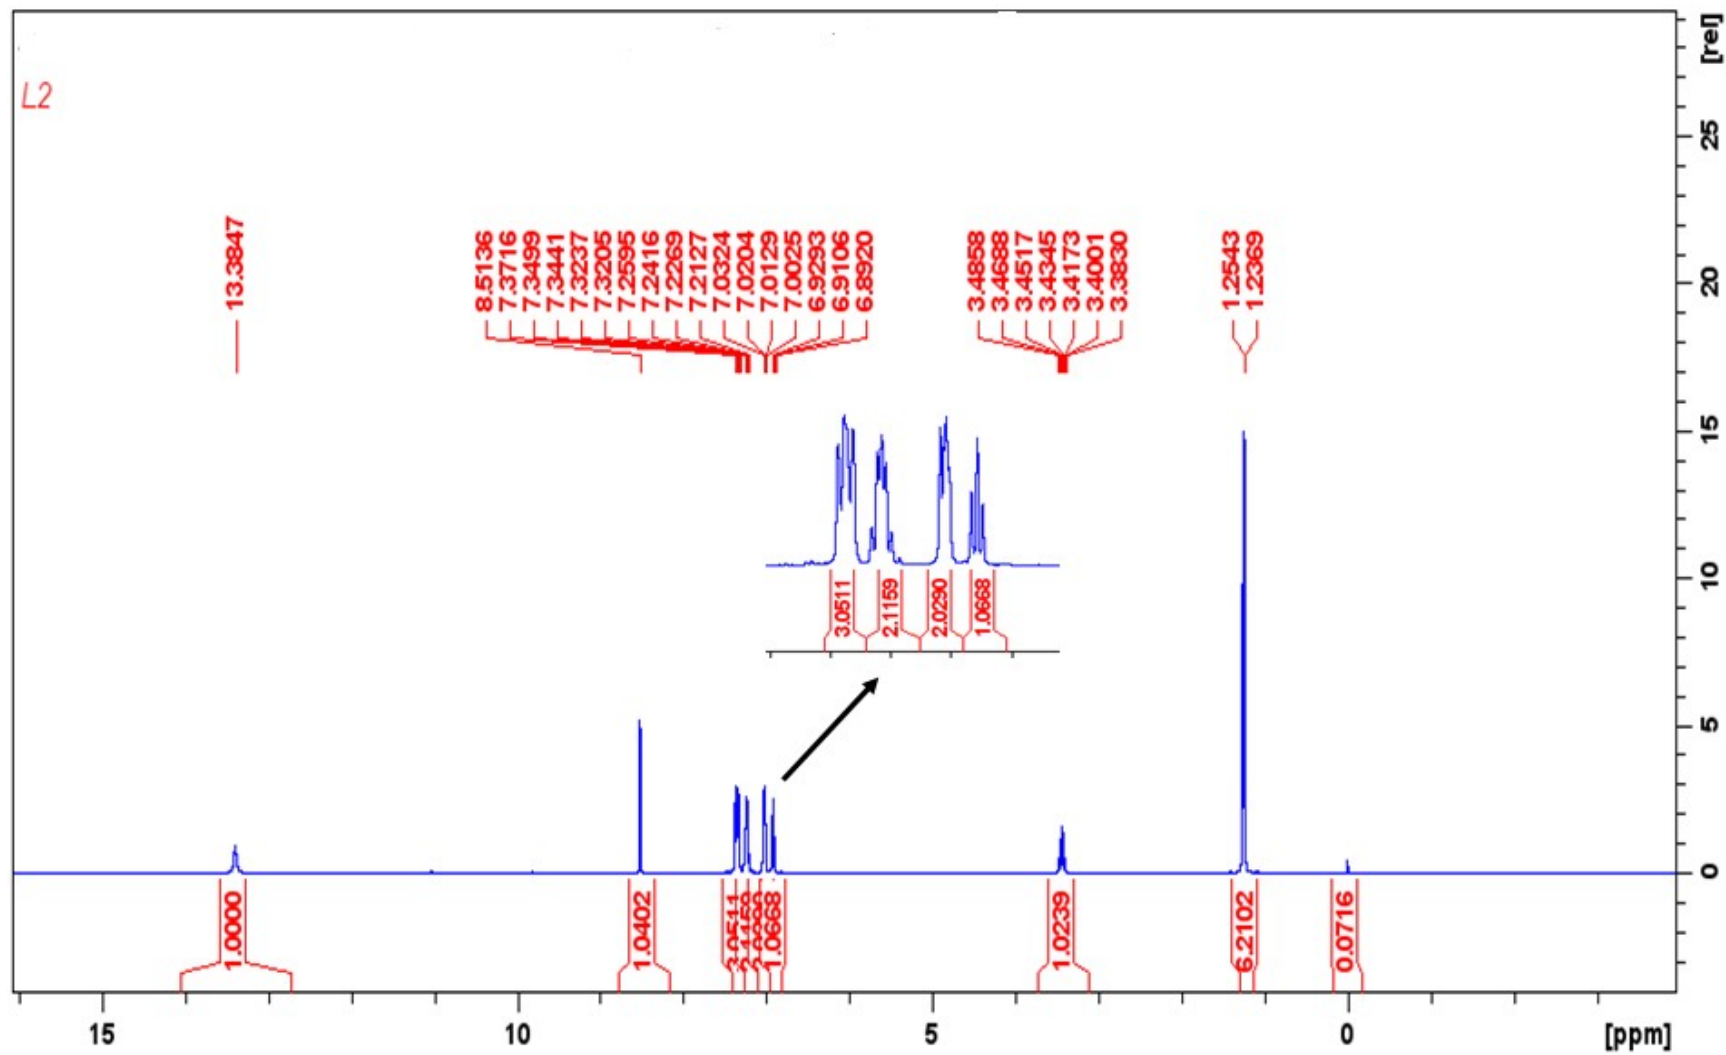

Figure 5. <sup>1</sup>H NMR for L2

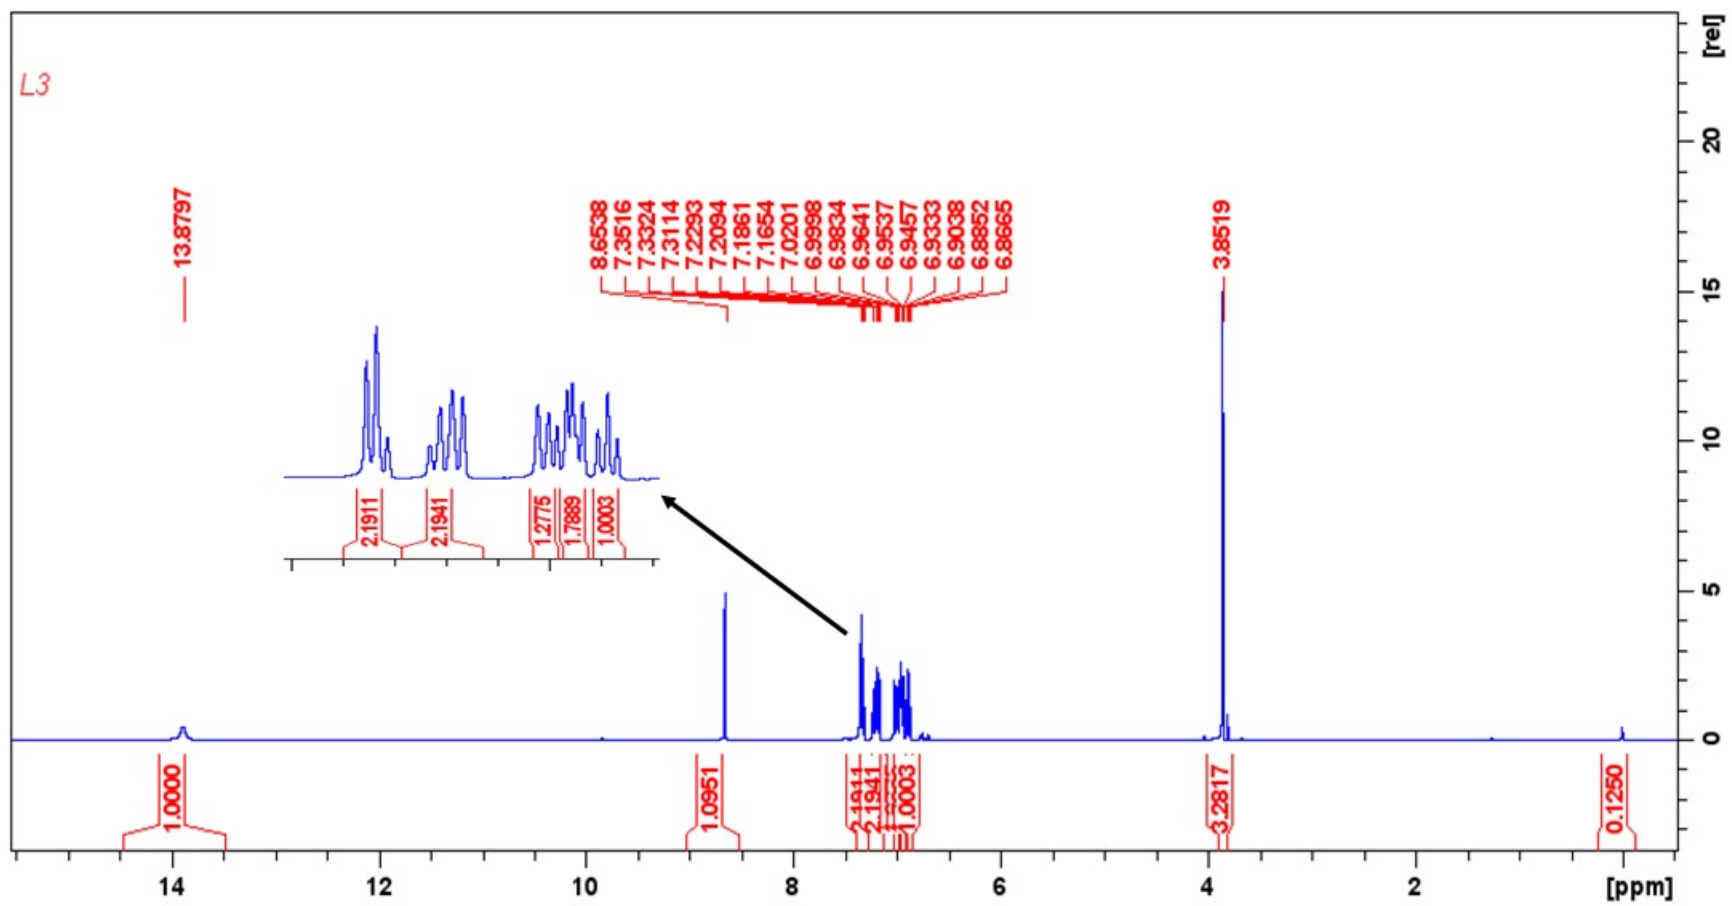

Figure 6.  $^1\text{H}$  NMR for L3

L1

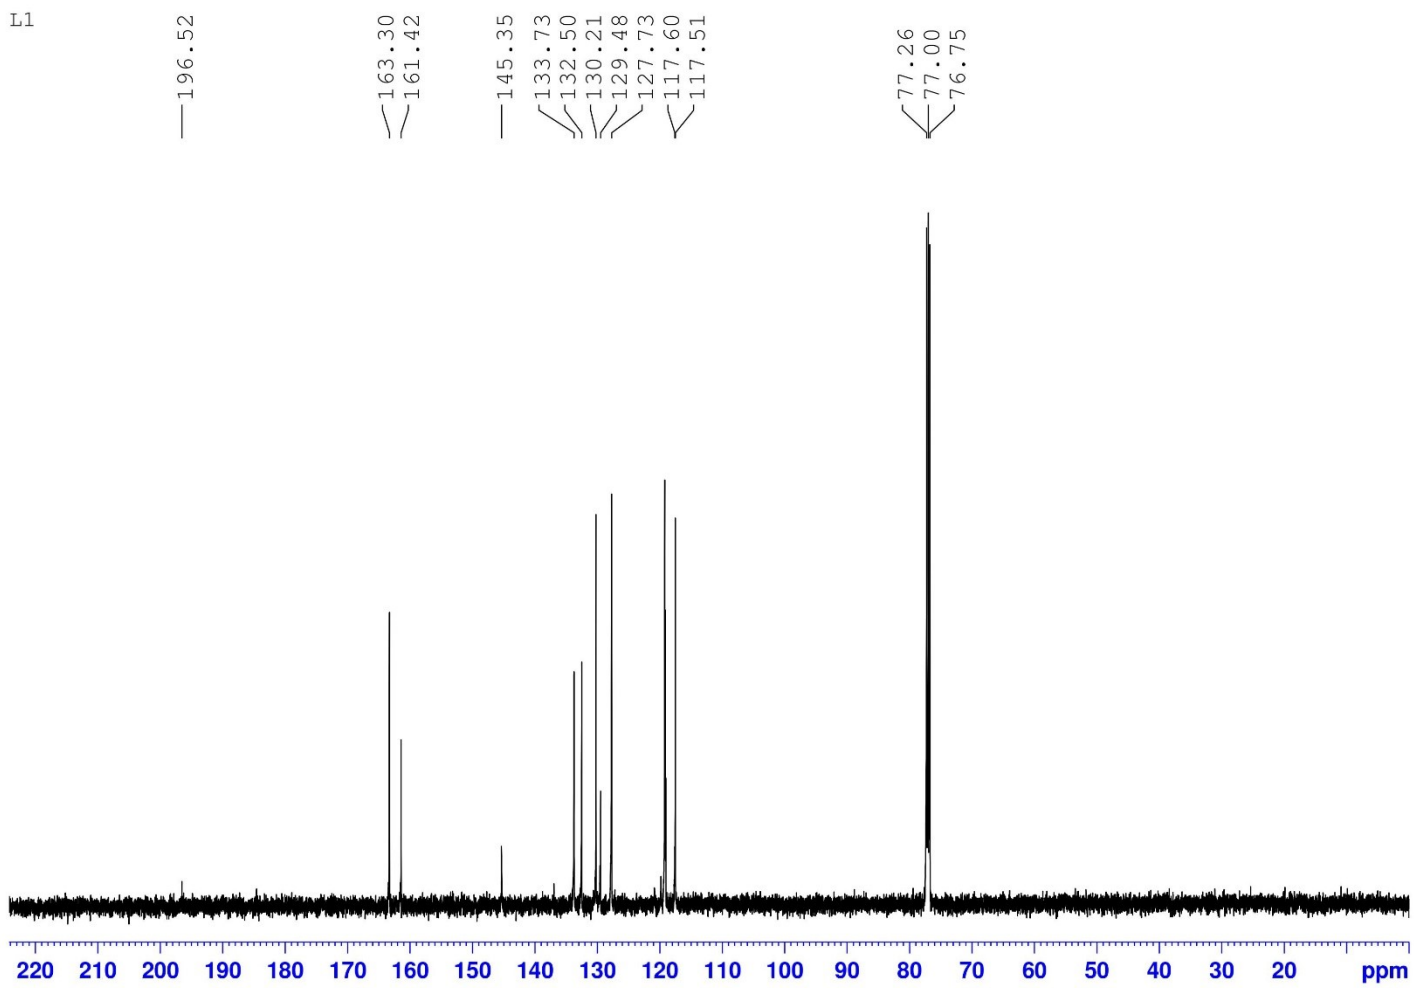

Figure 7.  $^{13}\text{C}$  NMR for 1



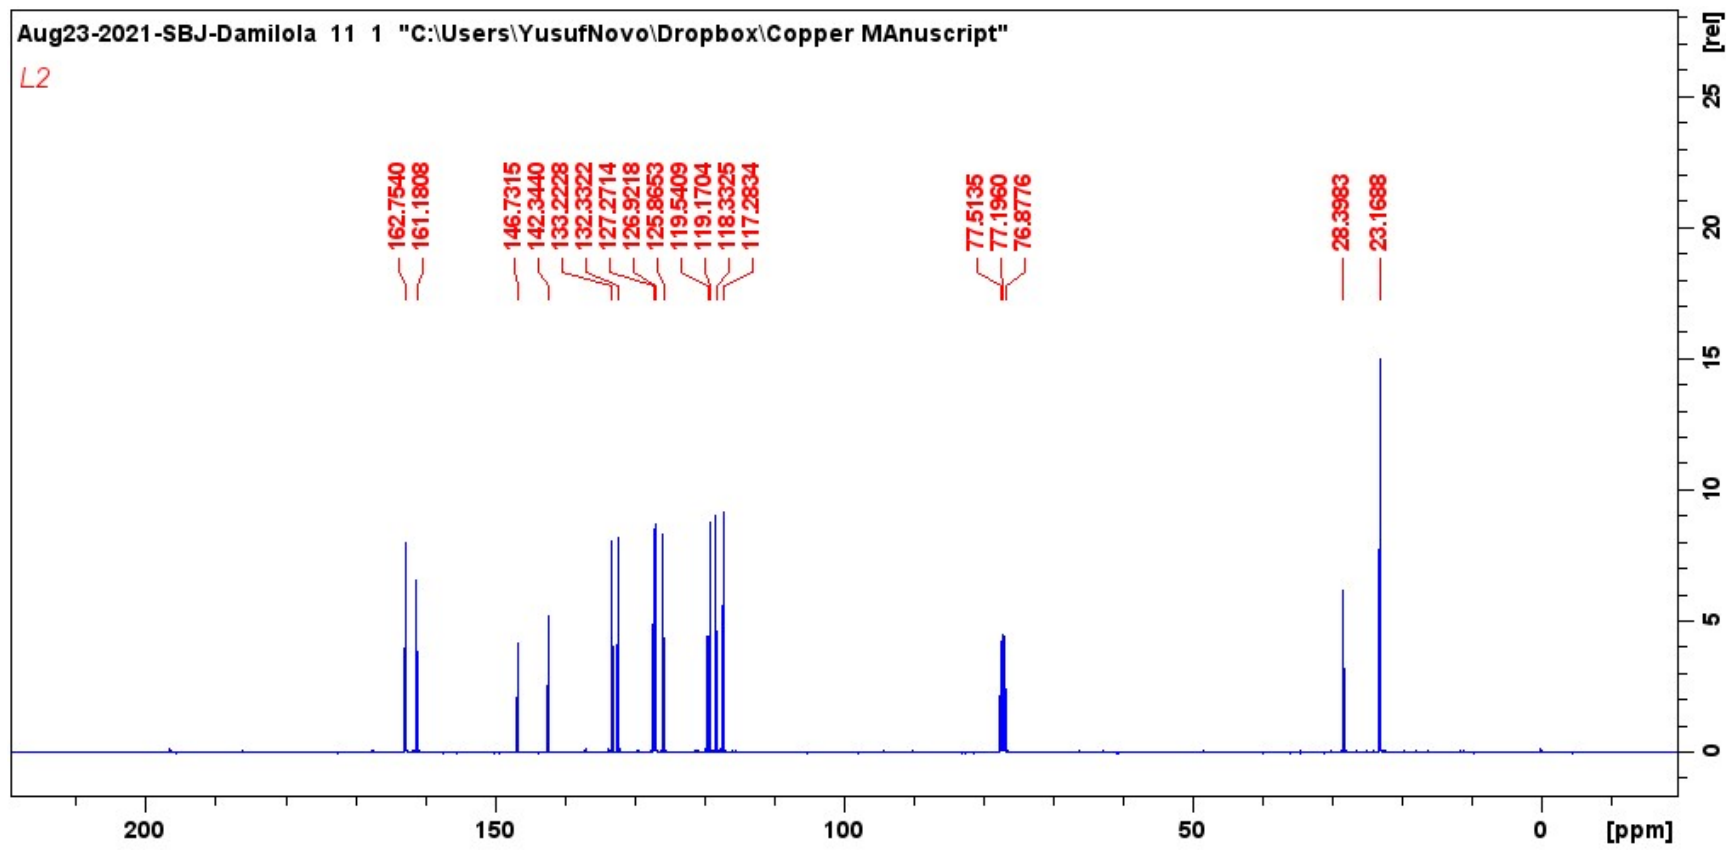

Figure 8.  $^{13}\text{C}$  NMR for L2

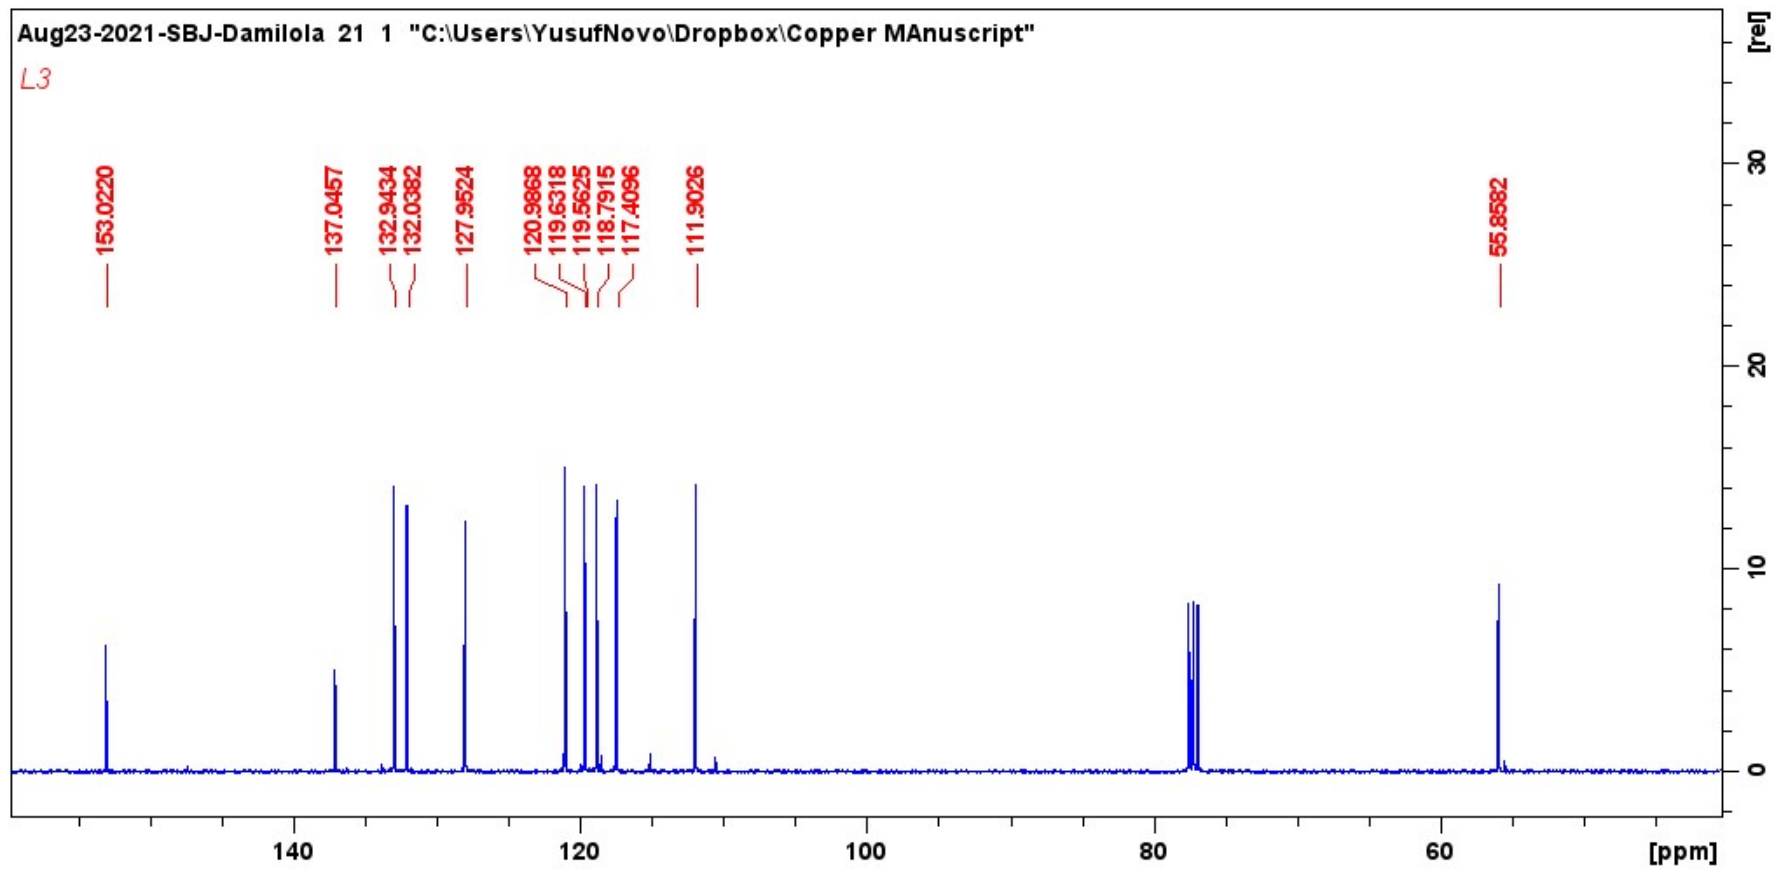

Figure 9. <sup>13</sup>C NMR for L3

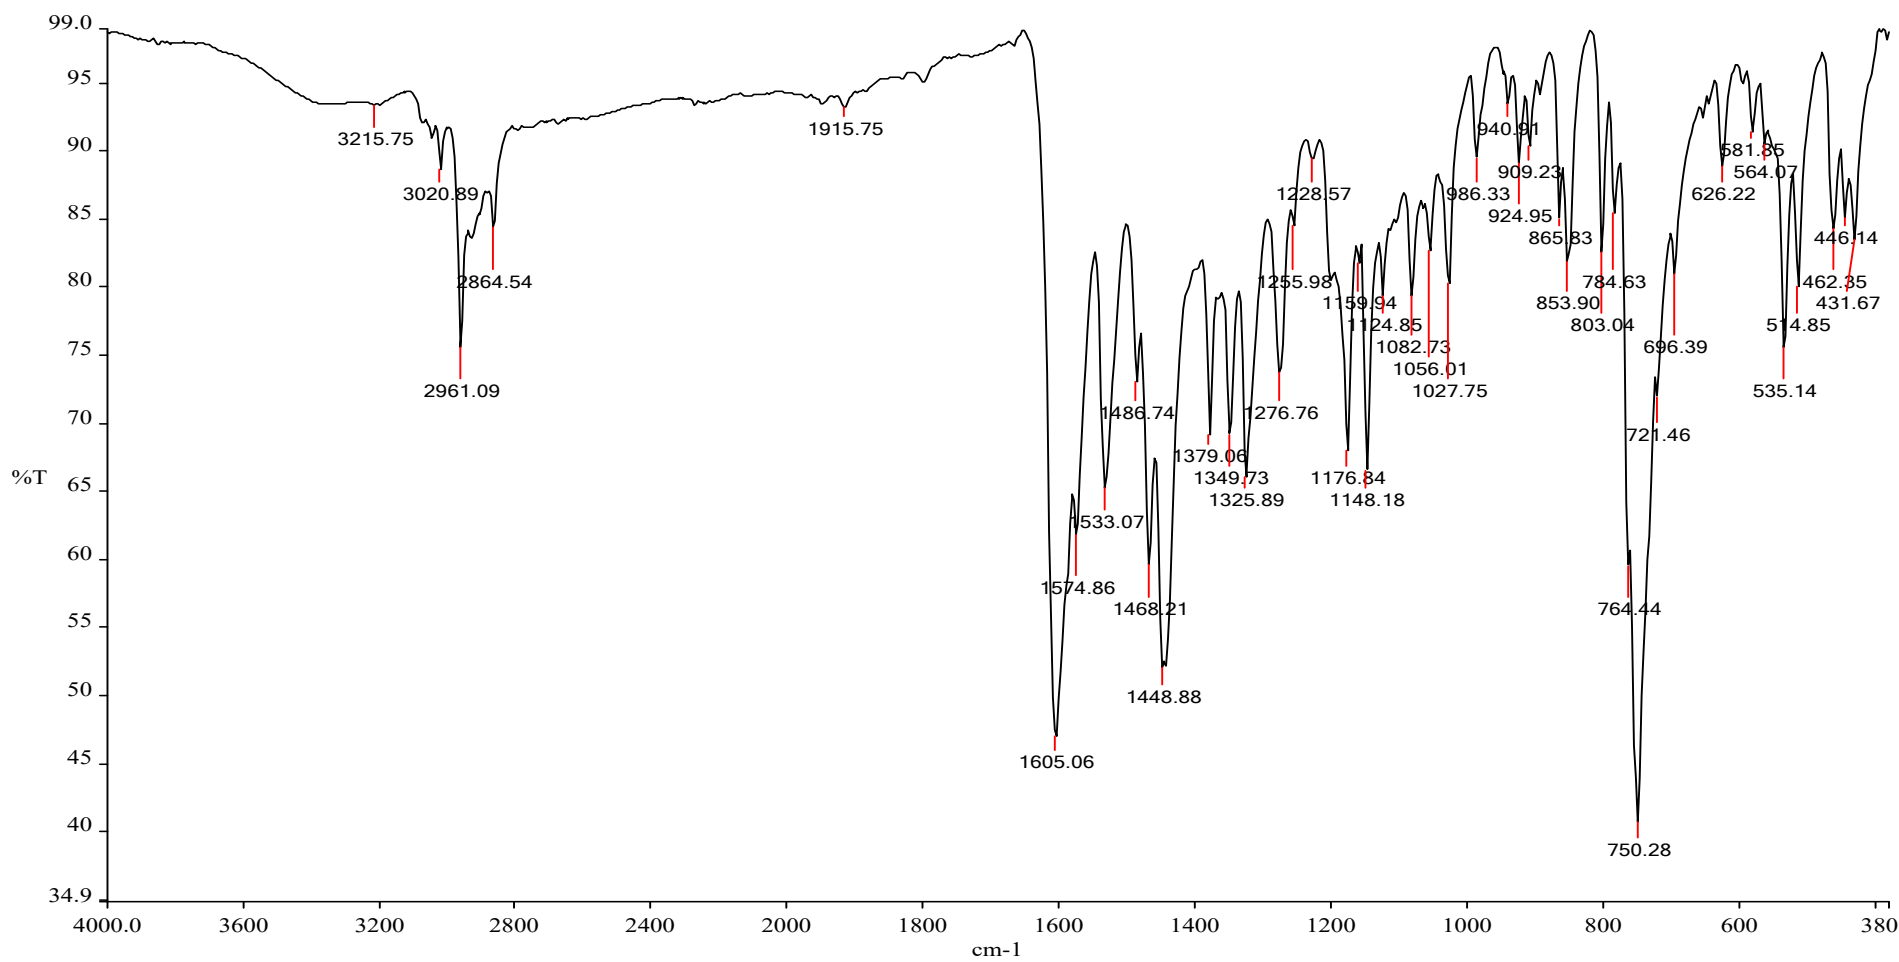

Figure 10. FT-IR for L1

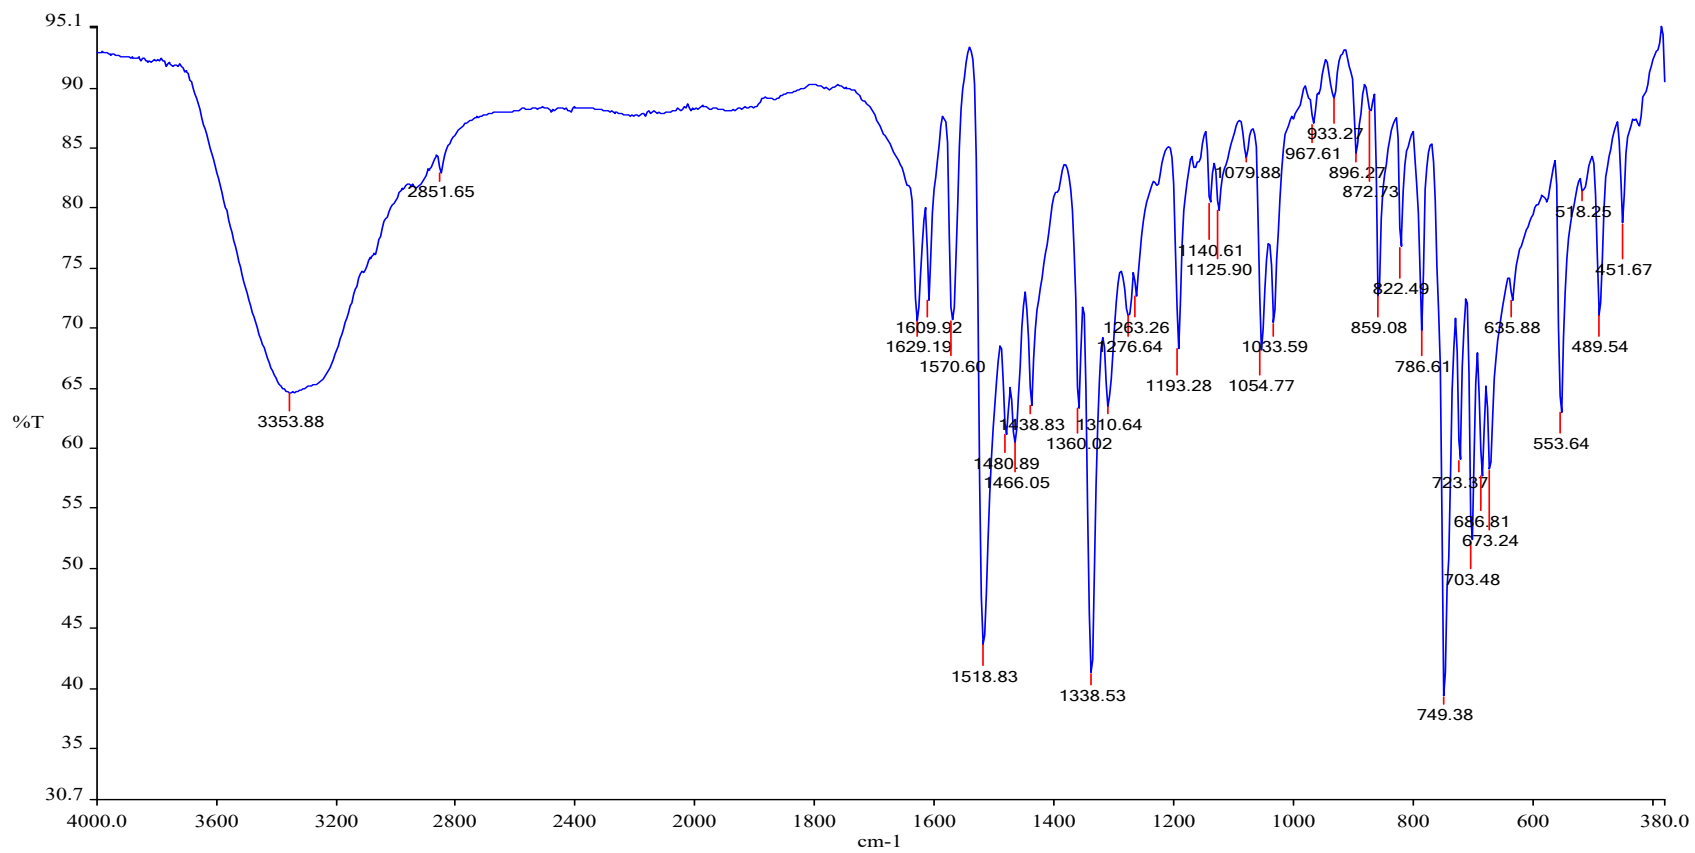

Figure 11. FT-IR for L2

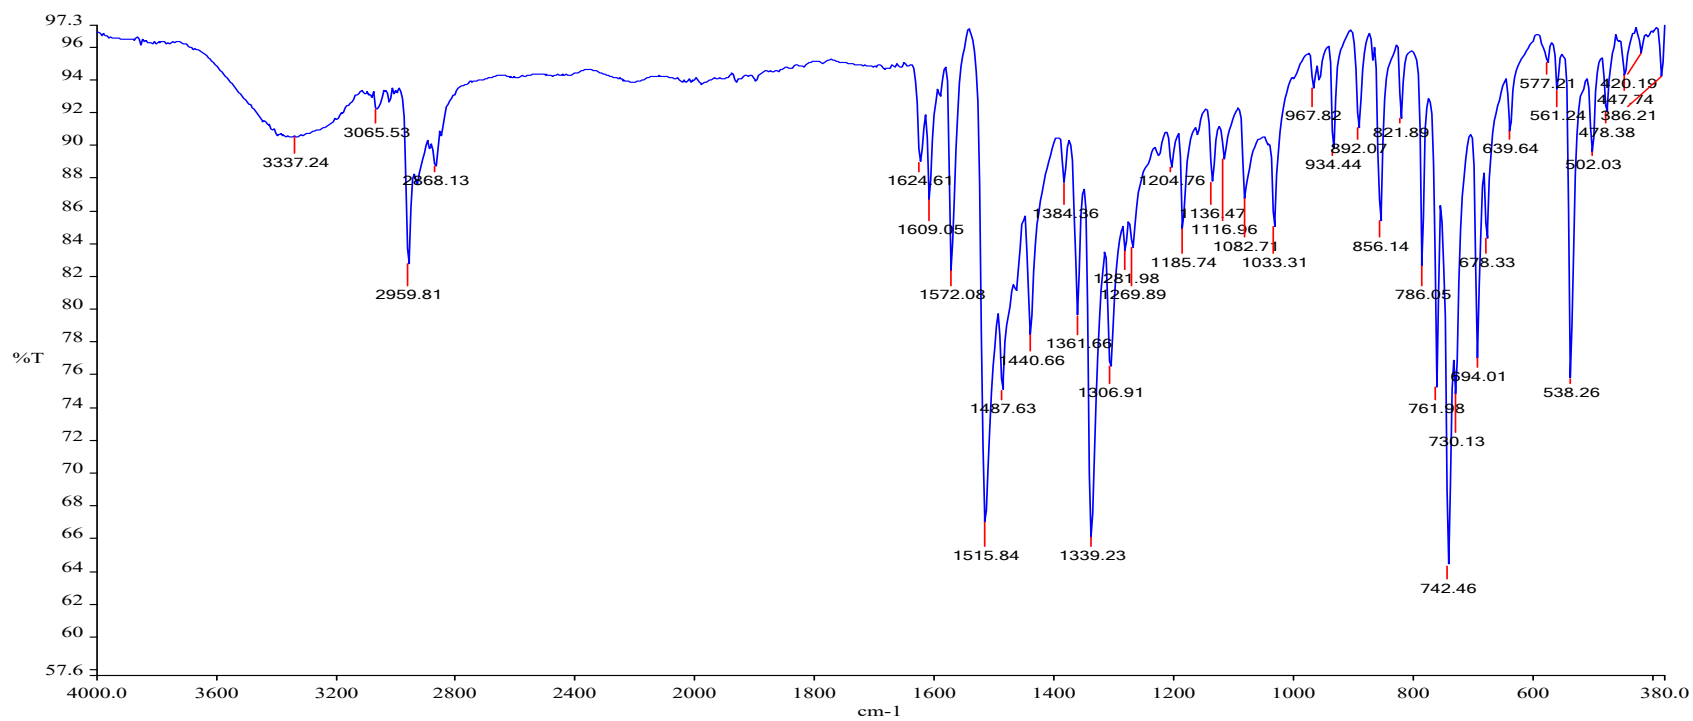

Figure 12. FT-IR for L3

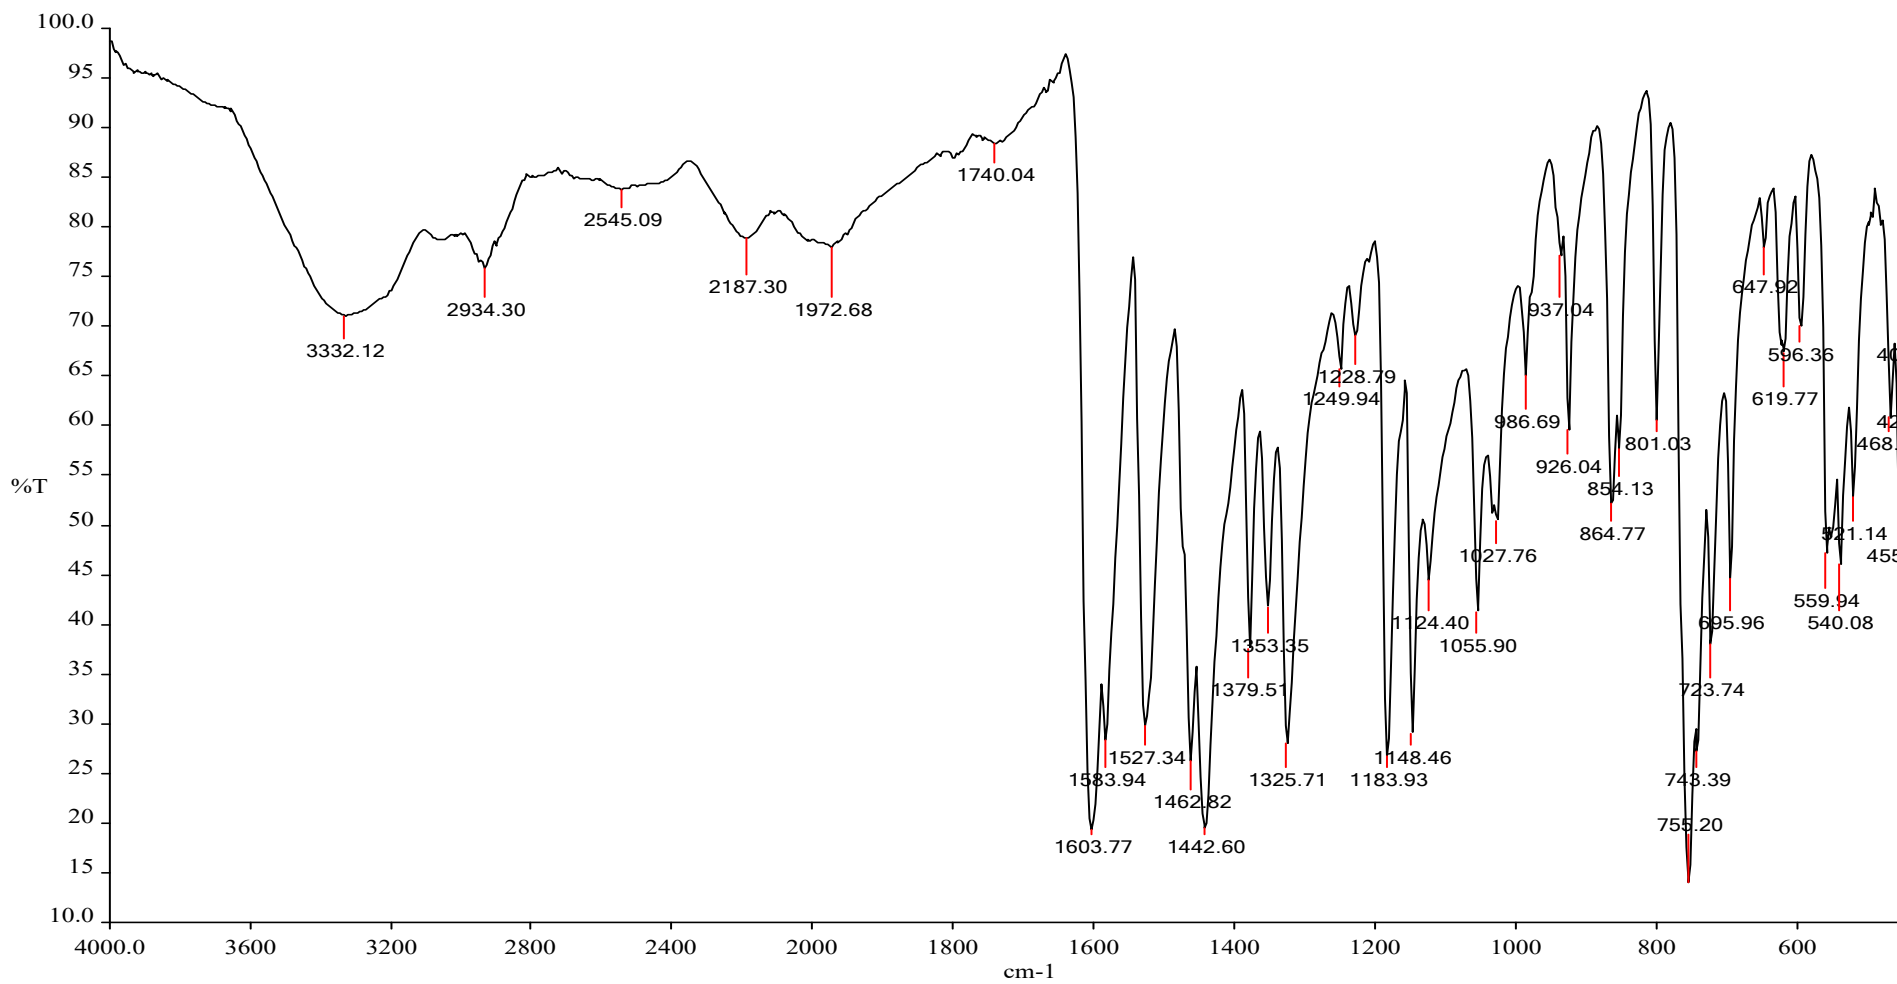

Figure 13. FT-IR for 1

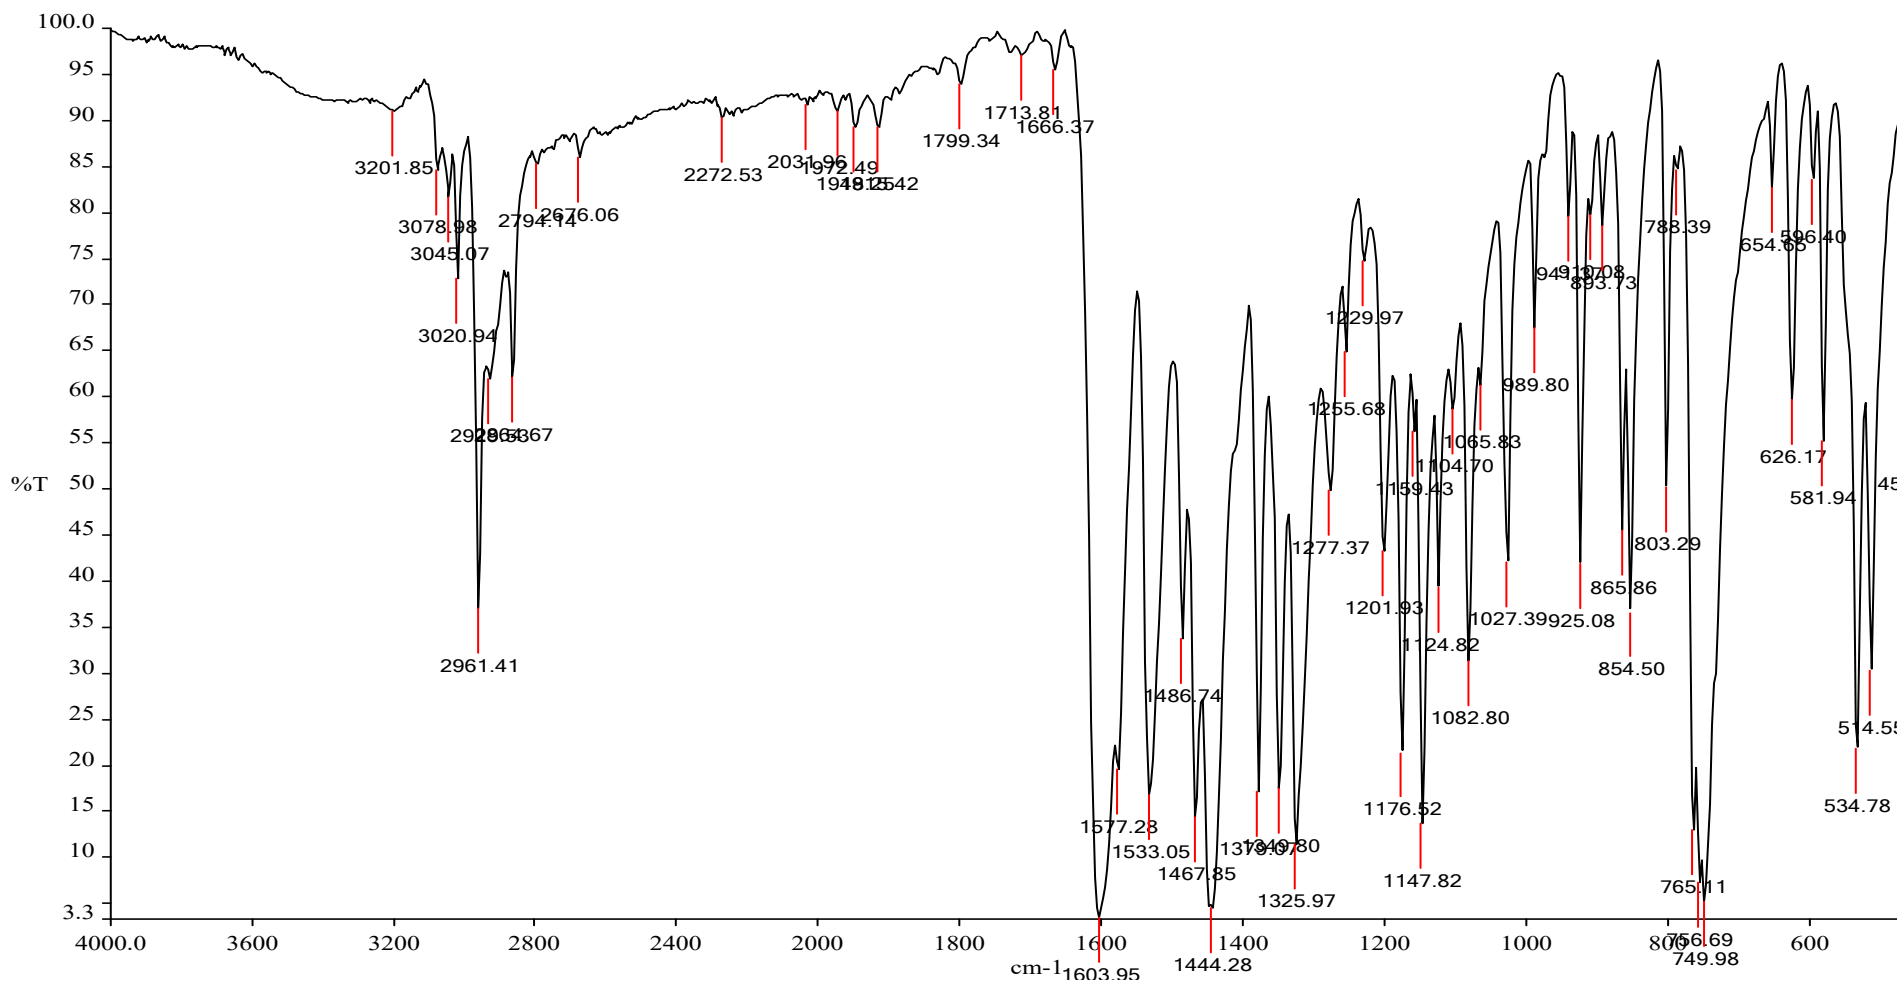

Figure 14. FT-IR for 2

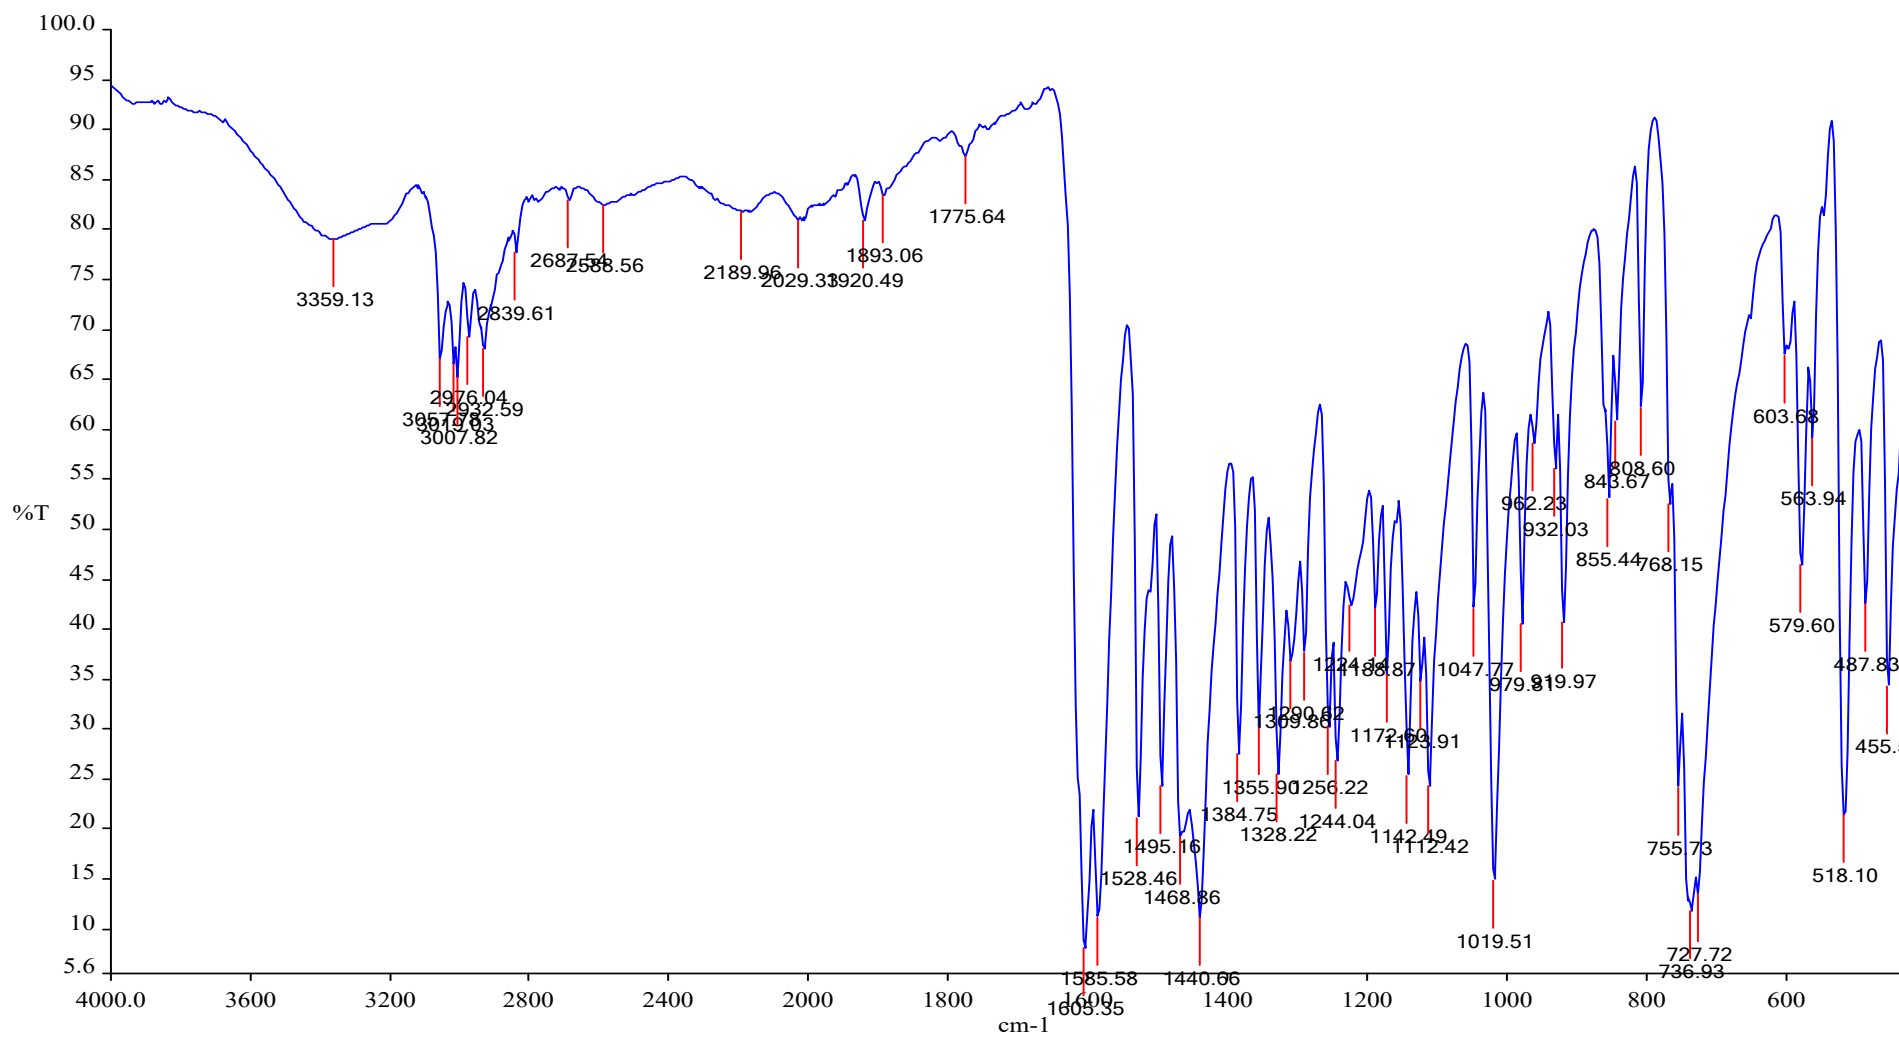

Figure 15. FT-IR for 3



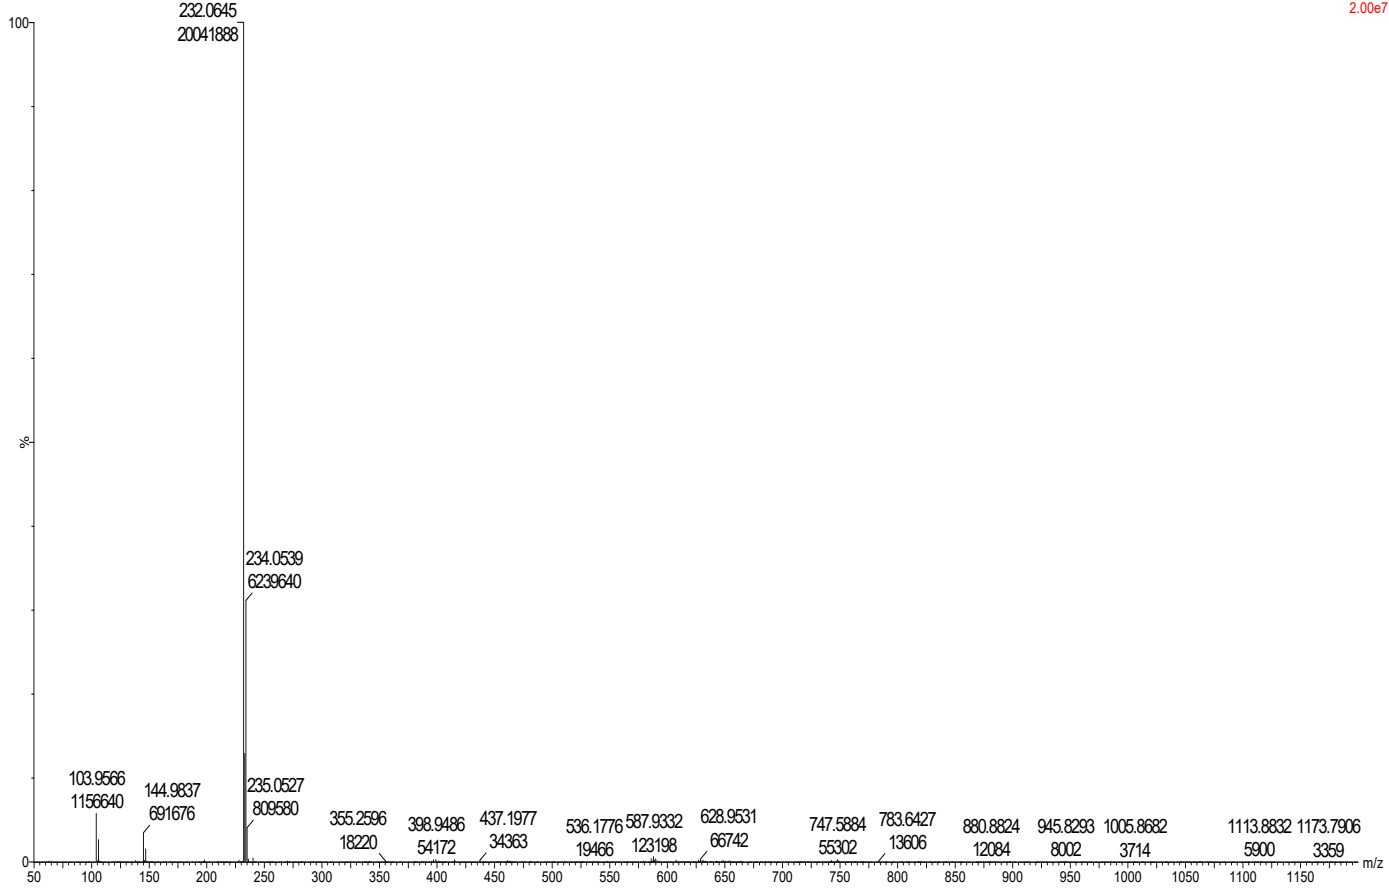

Figure 16. ESI-MS for 1

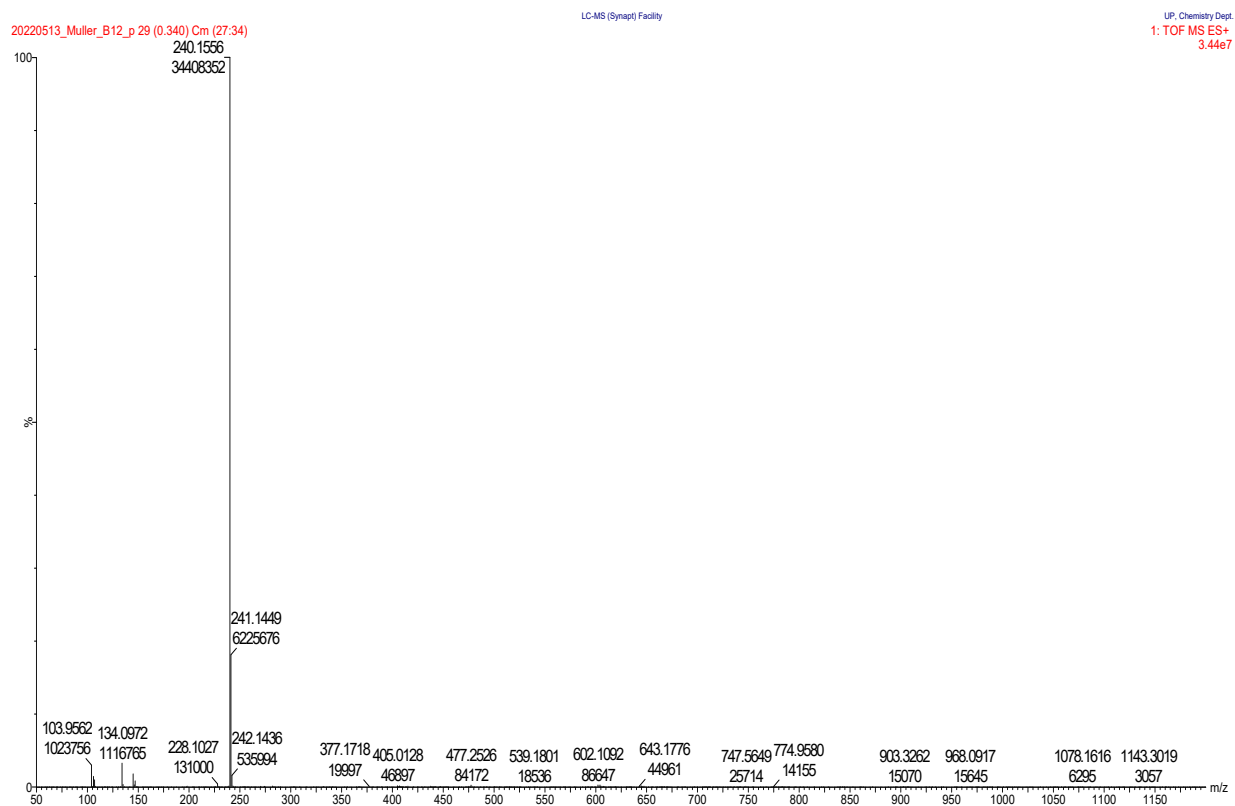

Figure 17. ESI-MS for 2

20220513\_Muller\_B11\_p\_30 (0.358) Cm (27:34)

LC-MS (Synapt) Facility

UP, Chemistry Dept.  
1: TOF MS ES+  
3.51e7

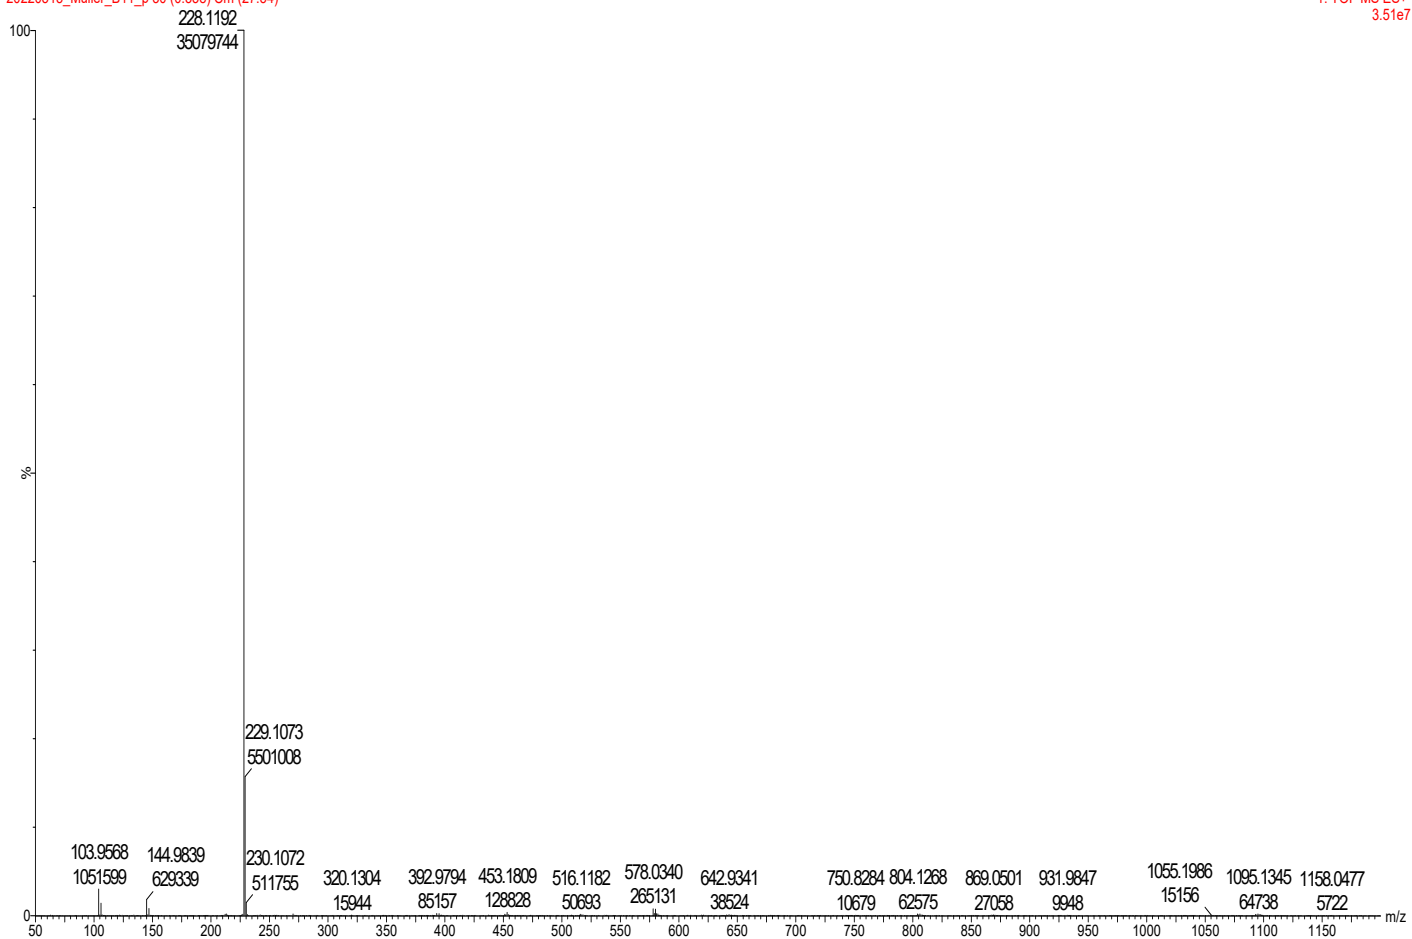

Figure 18. ESI-MS for 3

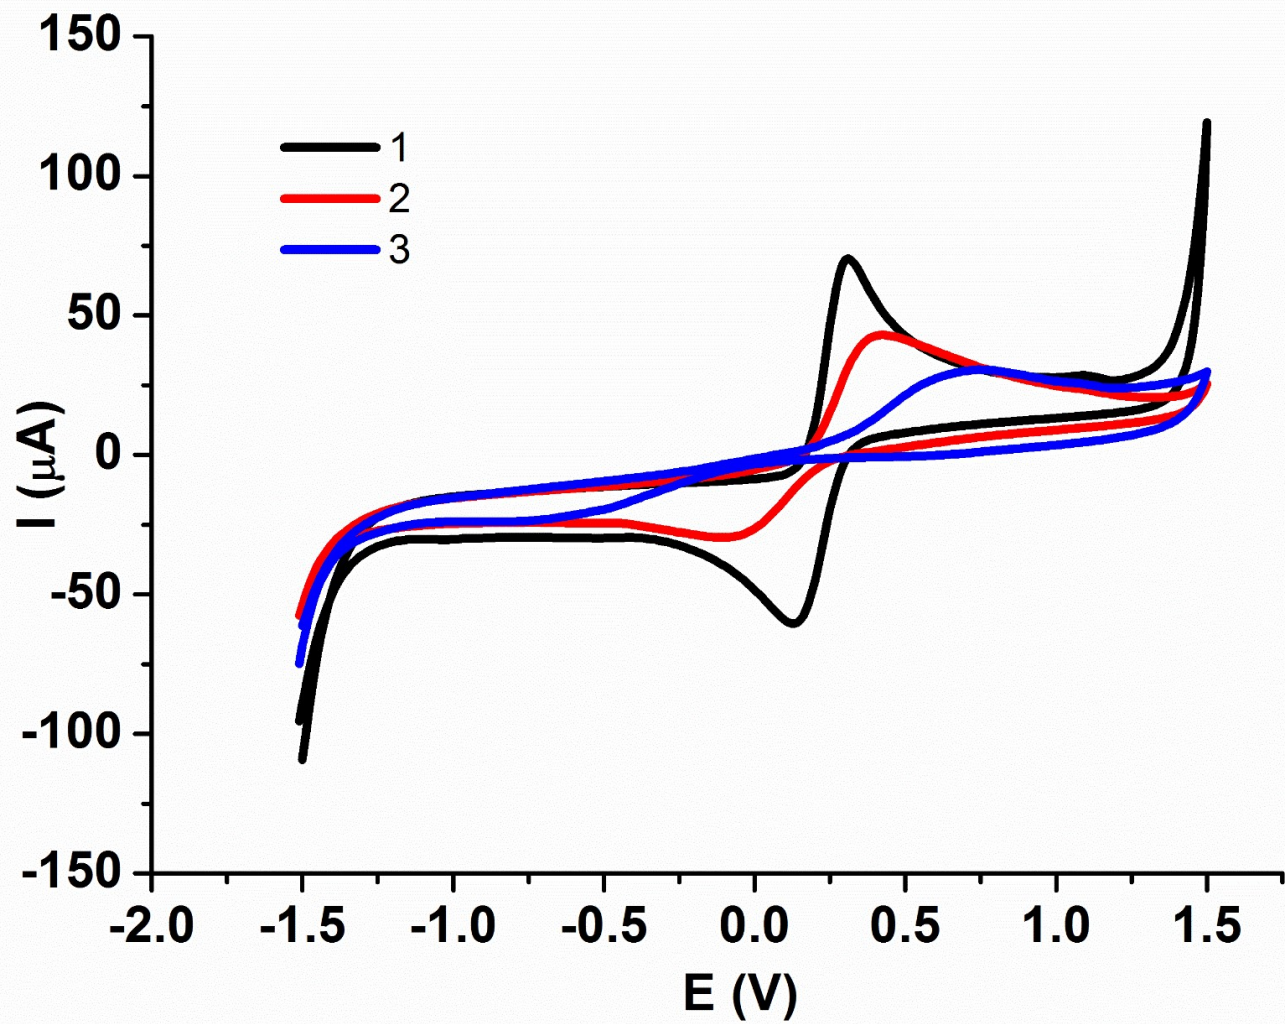

Figure 19. Cyclic voltammograms of 1-3
